# Supplementary material for: A convenient approach of MIP/Co–TiO2 nanocomposites with highly enhanced photocatalytic activity and selectivity under visible light irradiation
Source: Royal Society of Chemistry journal article supplement (doi:10.1039/c6ra10727c), 2016-01-01
Supplement: c6ra10727c1.pdf [file c6ra10727c1.pdf]

**Supplementary Information for RSC Advances**

**A convenient approach of MIP/Co-TiO<sub>2</sub> nanocomposites with highly enhanced photocatalytic activity and selectivity under visible light irradiation**

Yang Liu,<sup>a</sup> Jieliang Zhu,<sup>a</sup> Xiang Liu<sup>\*a</sup> and Hexing Li<sup>\*b</sup>

<sup>a</sup>The Laboratory of Food Colloids and Biotechnology, Ministry of Education, School of Chemical and Material Engineering, Jiangnan University, Wuxi 214122, P. R. China. E-mail: [liuxiang@jiangnan.edu.cn](mailto:liuxiang@jiangnan.edu.cn);

<sup>b</sup>The Key Laboratory of the Chinese Ministry of Education in Resource Chemistry, Shanghai Normal University, Shanghai 200234, P. R. China. E-mail: [hexing-li@shnu.edu.cn](mailto:hexing-li@shnu.edu.cn)

**Content**

|                                                                                                                                                      |           |
|------------------------------------------------------------------------------------------------------------------------------------------------------|-----------|
| <b>1. Element mapping</b>                                                                                                                            | <b>S2</b> |
| <b>2. Adsorption quantity of MIP/Co-TiO<sub>2</sub> and NIP/Co-TiO<sub>2</sub> nanocomposites towards different concentration of the RhB or Rh6G</b> | <b>S3</b> |

## 1. Element mapping

The distribution of the three components in the composite was characterized by X-ray Energy Dispersive Spectrometer (TEAM Octance Super, AMETEK, America). The results were showed in Fig.S1, Fig.S2 and Fig.S3 and indicated that three components were evenly distributed.

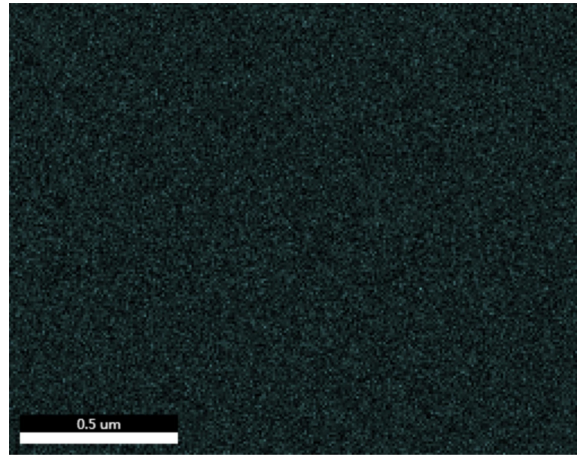

**Fig.S1** Distribution of Ti element

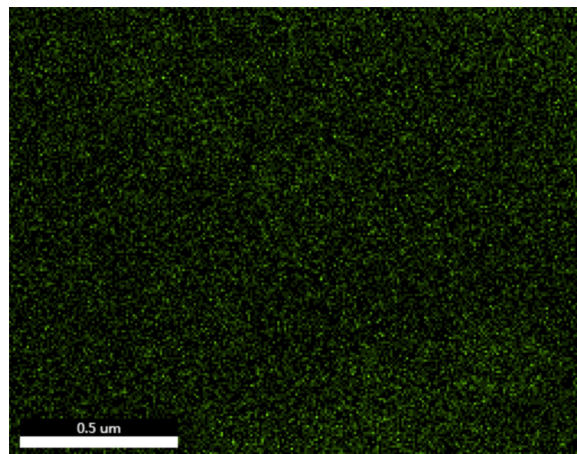

**Fig.S2** Distribution of O element

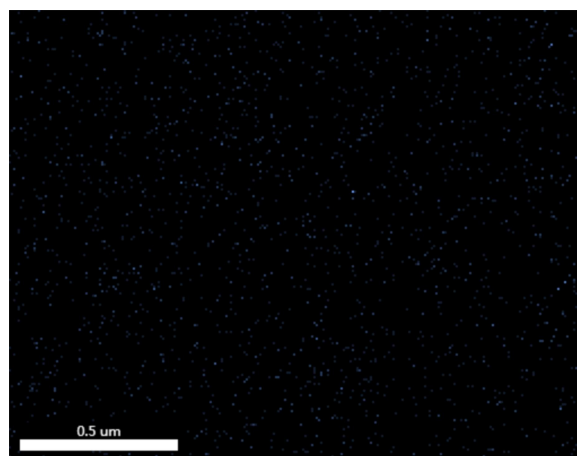

**Fig.S3** Distribution of Co element

## 2. Adsorption quantity of MIP/Co-TiO<sub>2</sub> and NIP/Co-TiO<sub>2</sub> nanocomposites towards different concentration of the RhB or Rh6G

The adsorption quantity (Q) of MIP/Co-TiO<sub>2</sub> and NIP/Co-TiO<sub>2</sub> nanocomposites towards different concentration of the RhB or Rh6G was investigated and showed in Fig. S4 and Fig. S5. The adsorption quantity of MIP/Co-TiO<sub>2</sub> and NIP/Co-TiO<sub>2</sub> nanocomposites towards the RhB or Rh6G in 120 min had a little increase as the concentration of the RhB or Rh6G increased. The results showed that the change of concentration of the RhB or Rh6G almost did not affect the adsorption quantity of MIP/Co-TiO<sub>2</sub> and NIP/Co-TiO<sub>2</sub> nanocomposites towards the RhB or Rh6G.

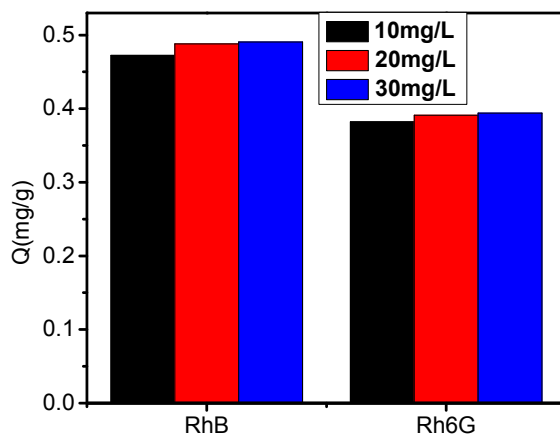

Fig.S4 Adsorption quantity of MIP/Co-TiO<sub>2</sub> nanocomposites towards different concentration of the RhB or Rh6G in 120 min

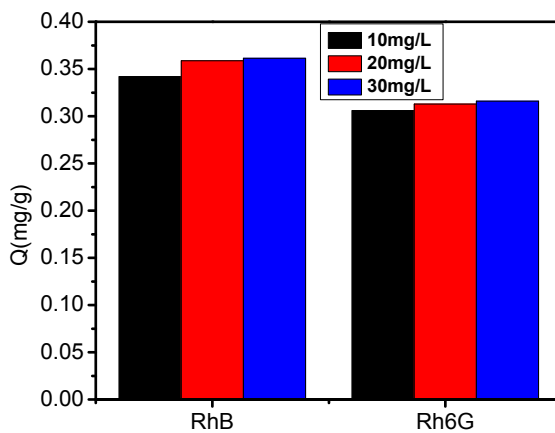

Fig.S5 Adsorption quantity of NIP/Co-TiO<sub>2</sub> nanocomposites towards different concentration of the RhB or Rh6G in 120 min
